# Supplementary material
Source: publisher figshare collection journal article supplement (https://acs.figshare.com/ndownloader/files/14690879)
Supplement: Supplementary file 1 [file 14690879]

---

## **Supporting Information**

### **UV-driven anti-fouling paper fibers membranes for efficient oil-water separation**

Yangyang Chen<sup>a</sup>, Atian Xie<sup>a</sup>, Jiuyun Cui<sup>b</sup>, Jihui Lang<sup>c</sup>, Yongsheng Yan<sup>a</sup>, Chunxiang Li<sup>a\*</sup>, Jiangdong Dai<sup>a\*</sup>

<sup>a</sup>Institute of Green Chemistry and Chemical Technology, School of Chemistry and Chemical Engineering, and <sup>b</sup>School of Materials Science and Engineering, Jiangsu University, Zhenjiang 212013, China

<sup>c</sup>College of Physics, Jilin Normal University, Siping 136000, China

\*Corresponding Author

E-mail: lcx@mail.ujcs.edu.cn; Daijd@mail.ujcs.edu.cn

Tel: +86 0511-88790683; Fax: +86 0511-88791800

Table S1. Comparison of this paper and others.

| Materials                  | Separation efficiency | Cost      | Cycles of use | Toxicity      | Complexity | Ref.                                 |
|----------------------------|-----------------------|-----------|---------------|---------------|------------|--------------------------------------|
| Stainless steel mesh       | >97%                  | High cost | 20 times      | Non-toxicity  | easy       | Appl. Surf. Sci. 2017, 416, 344-352. |
| Stainless steel mesh       | /                     | High cost | 5 times       | Non-toxicity  | easy       | Sci. Rep. 2013, 3, 2326              |
| PVDF powder                | >99.97%               | High cost | 10 times      | Non-toxicity  | complex    | J. Mem. Sci. 2012, 401-402, 132-143  |
| Hard/soft substrates       | /                     | Low cost  | 800 times     | High-toxicity | complex    | J. Mem. Sci. 2011, 385, 251-262      |
| Cellulose acetate membrane | /                     | Low cost  | /             | Non-toxicity  | easy       | Chem. Eng. J. 2014, 237, 70-80       |
| Paper                      | >99%                  | Low cost  | 80 times      | Non-toxicity  | easy       | This paper                           |

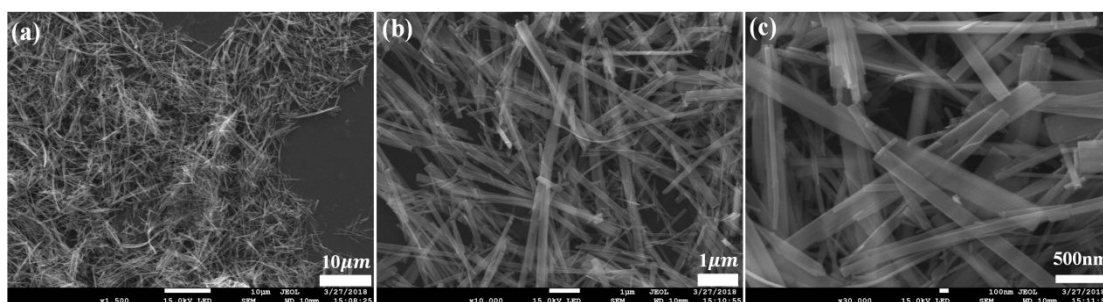

Fig. S1. SEM images of TiO<sub>2</sub> nanowires.

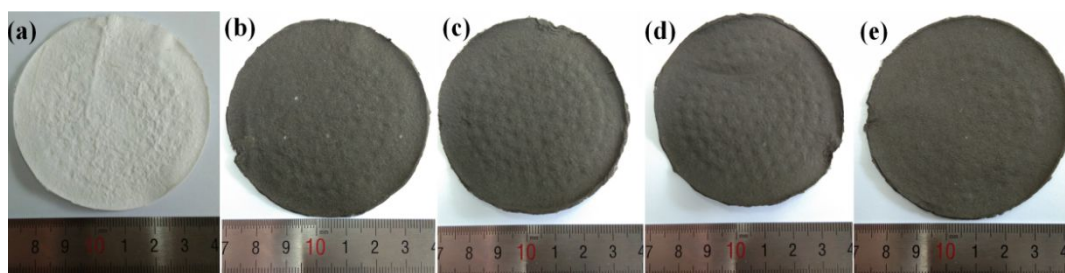

Fig. S2. Photographs of PF and PF@PDA@TiO<sub>2</sub>-X: (a) PF, (b) PF@PDA, (c) PF@PDA@TiO<sub>2</sub>-2, (d) PF@PDA@TiO<sub>2</sub>-4 and (e) PF@PDA@TiO<sub>2</sub>-6.

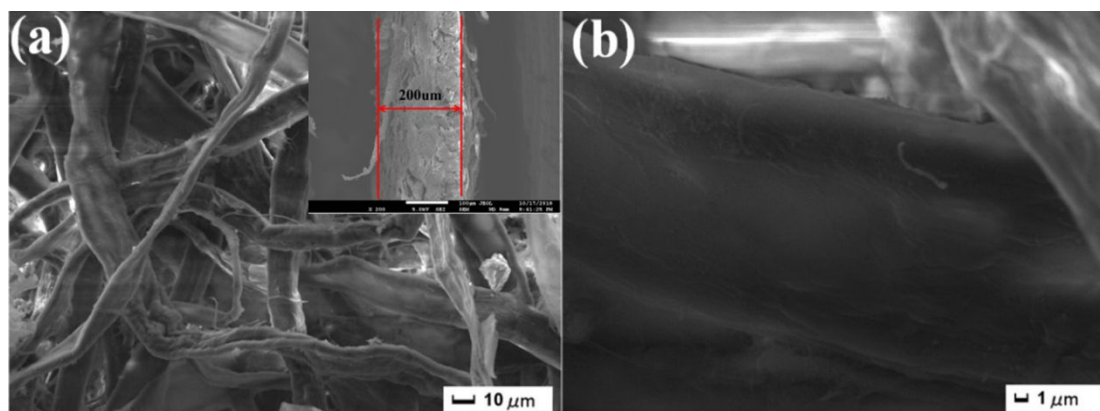

Fig. S3. SEM images of PF.

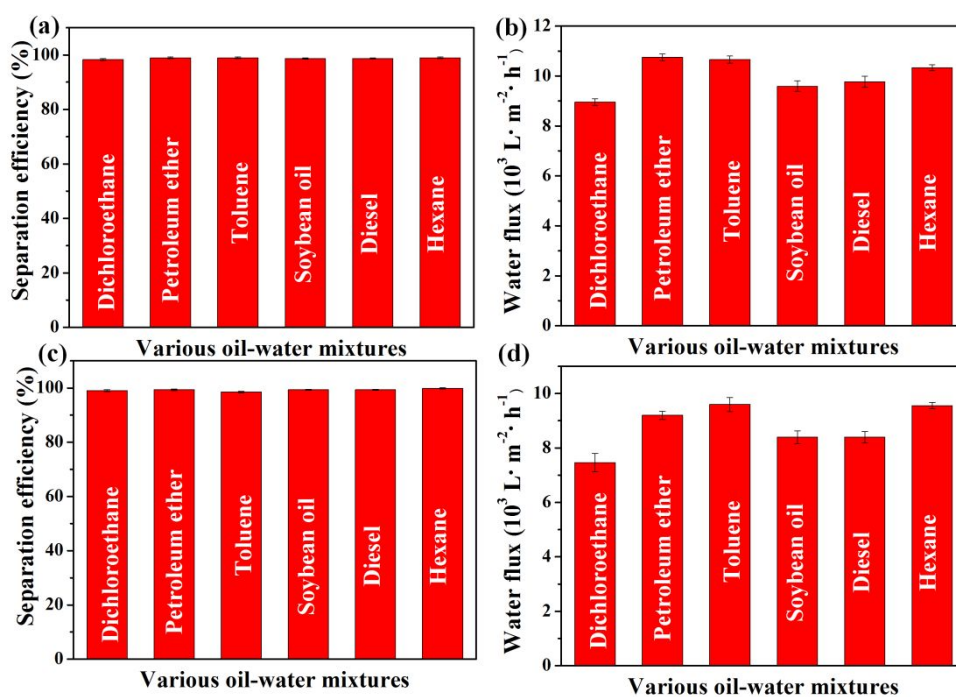

Fig. S4. Separation efficiency and water flux for a series of oil-water mixtures: (a), (b)

PF@PDA@TiO<sub>2</sub>-2, (c), (d) PF@PDA@TiO<sub>2</sub>-6.

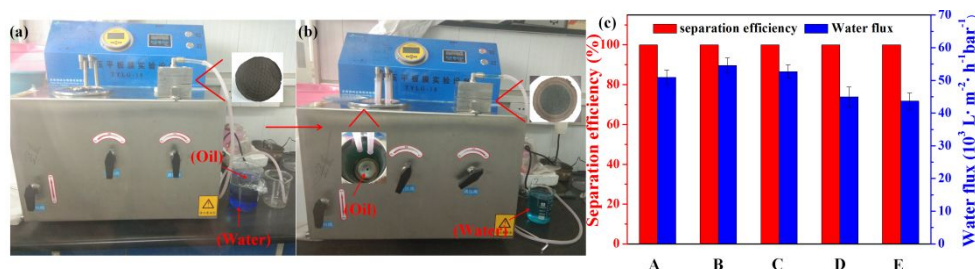

Fig. S5. Photographs of oil (colorless)-water (blue) cross-flow filtration device (a,b); Separation efficiency and water flux of PF@PDA@TiO<sub>2</sub> for different oil-water mixtures(c). (A-E represent hexane, petroleum ether, , toluene dichloroethane, soybean oil and water mixtures)

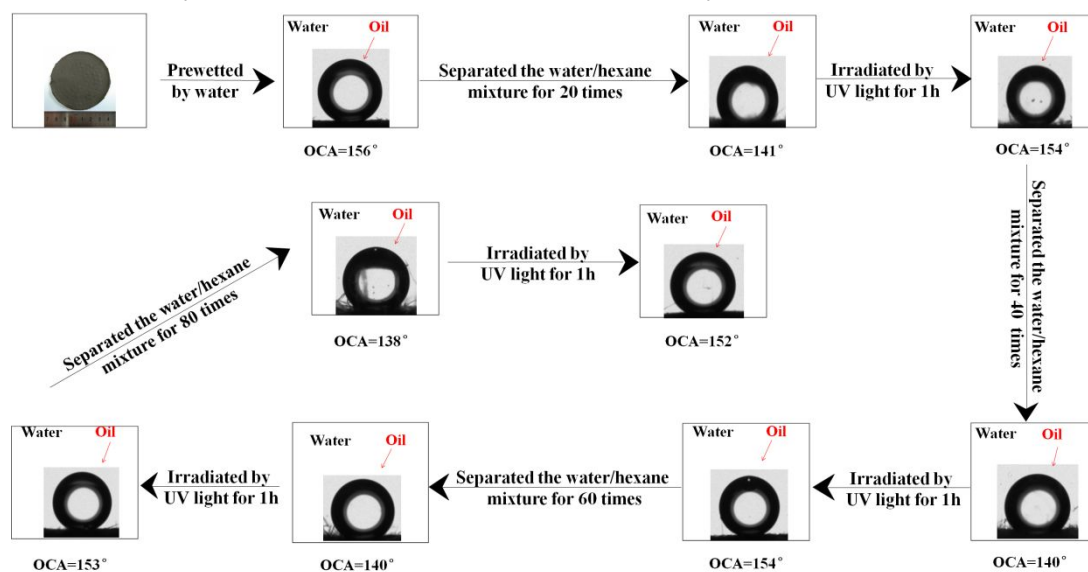

Fig. S6. An intuitive process diagram of OCAs underwater in 80 times oil-water separations.

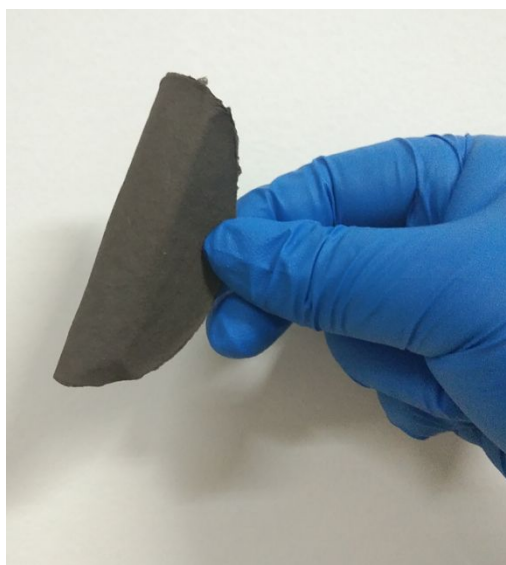

Fig. S7. The flexibility of PF@PDA@TiO<sub>2</sub>.

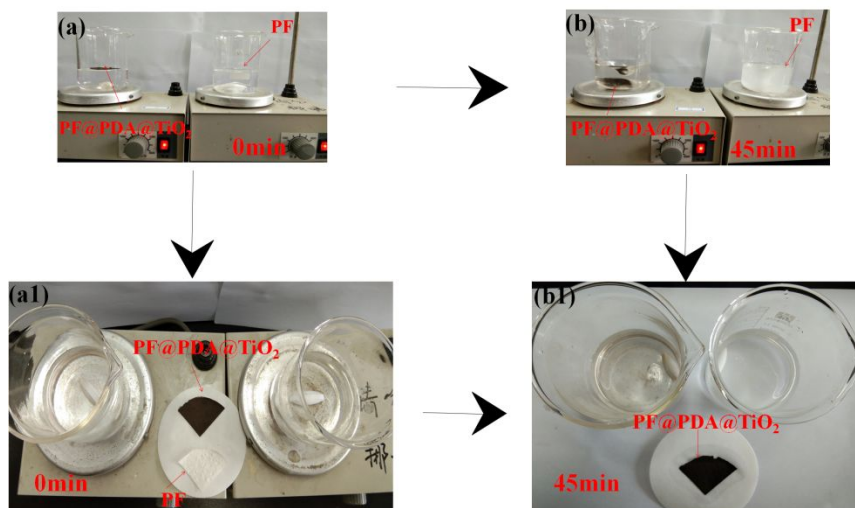

Fig. S8. The durability of PF and PF@PDA@TiO<sub>2</sub>: (a) The original state and (a1) magnifying state of PF and PF@PDA@TiO<sub>2</sub> before stirring, (b) The original state and (b1) magnifying state after stirring 45 min.
